# Supplementary material for: STM-based molecular detection of “catch-and-release” of protons for bipyridine bound to phenylene–ethynylene thiol
Source: Royal Society of Chemistry journal article supplement (doi:10.1039/b402251c), 2004-01-01

Electronic Supplementary Information for *Chem. Commun.*

This journal is © the Royal Society of Chemistry 2004.

Cross sectional profiles of the STM images before and after the addition of TfOH

Before the addition of TfOH


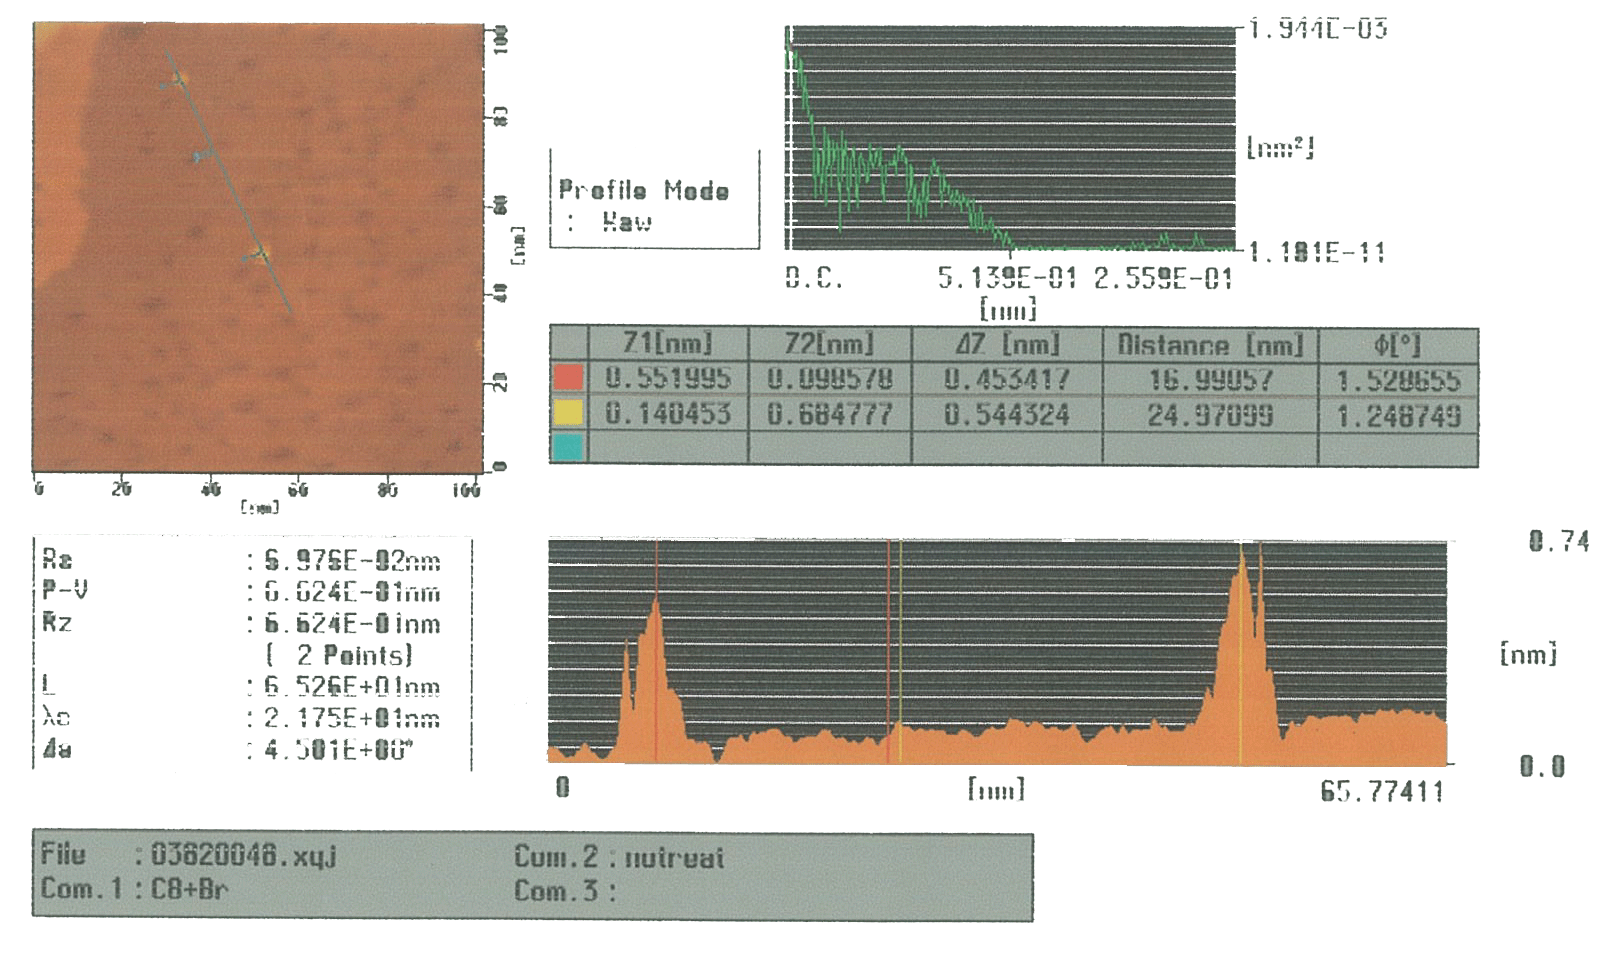


After the addition of TfOH


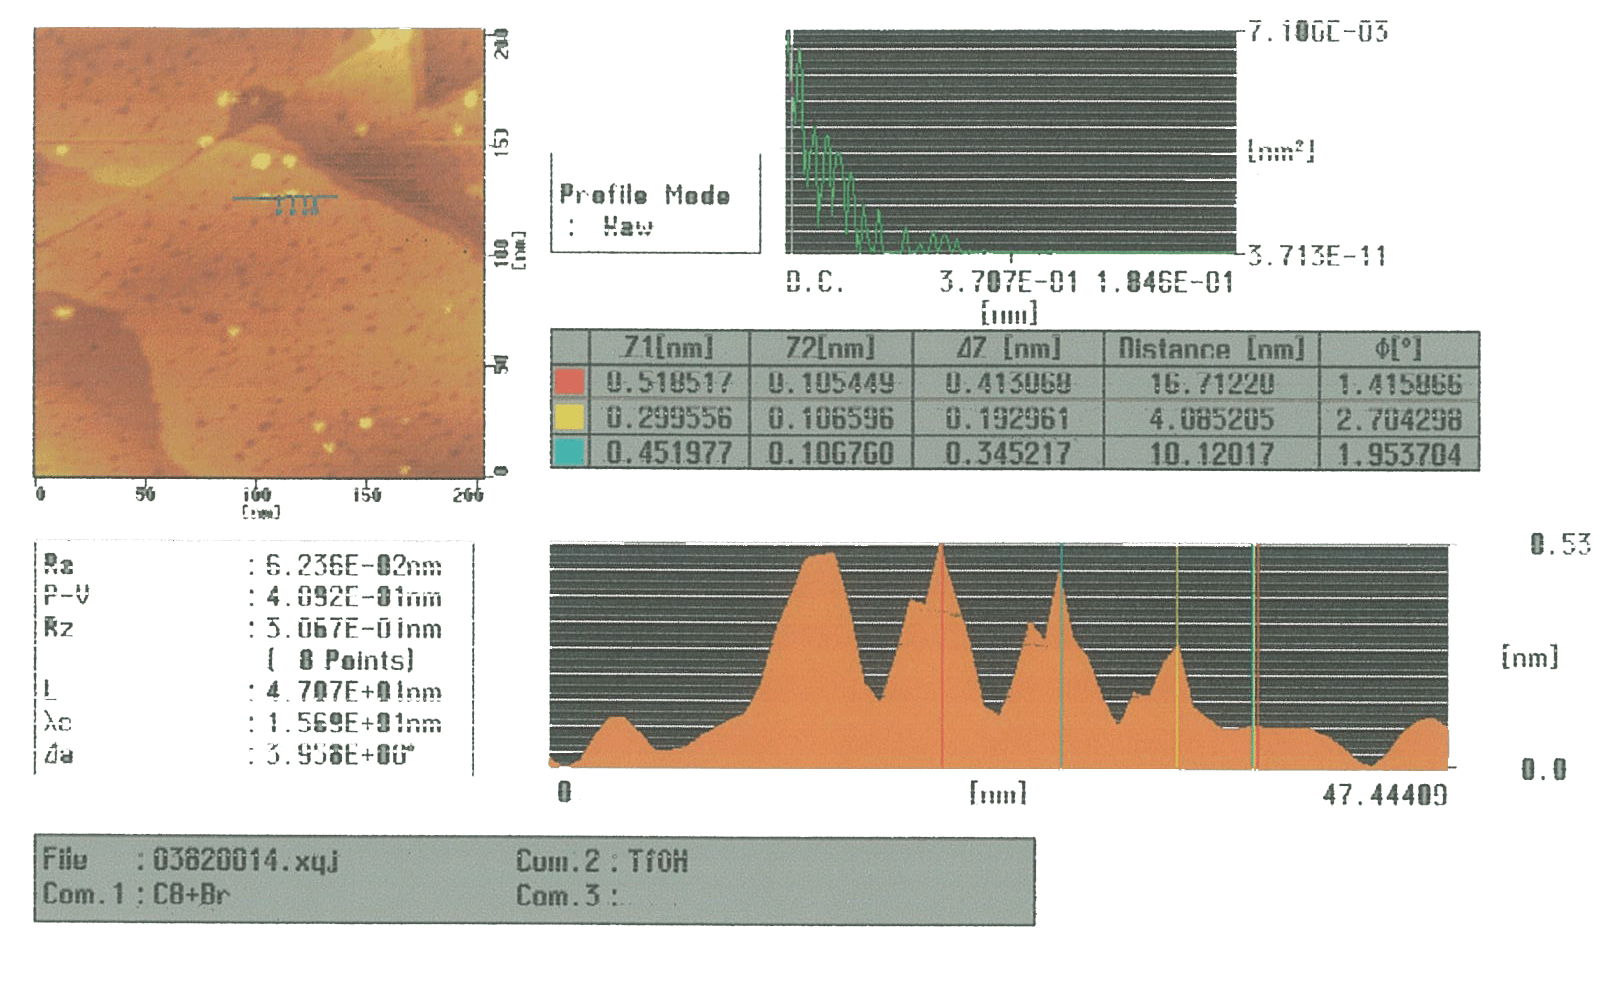

Supplement: b402251c.doc [file b402251c.doc]
